# Supplementary material for: Spatiotemporal dynamics of random stimuli account for trial-to-trial variability in perceptual decision making
Source: PubMed Central journal article supplement (PMC4707533; doi:10.1038/srep18832), 2016-01-11
Supplement: srep18832-s1.pdf [file srep18832-s1.pdf]

1 **Spatiotemporal dynamics of random stimuli account for trial-to-trial variability in**  
2 **perceptual decision making**

3 Hame Park, Jan-Matthis Lueckmann, Katharina von Kriegstein, Sebastian Bitzer, Stefan J.  
4 Kiebel

5 **Supplementary Information**

6 Supplementary figures 1-6

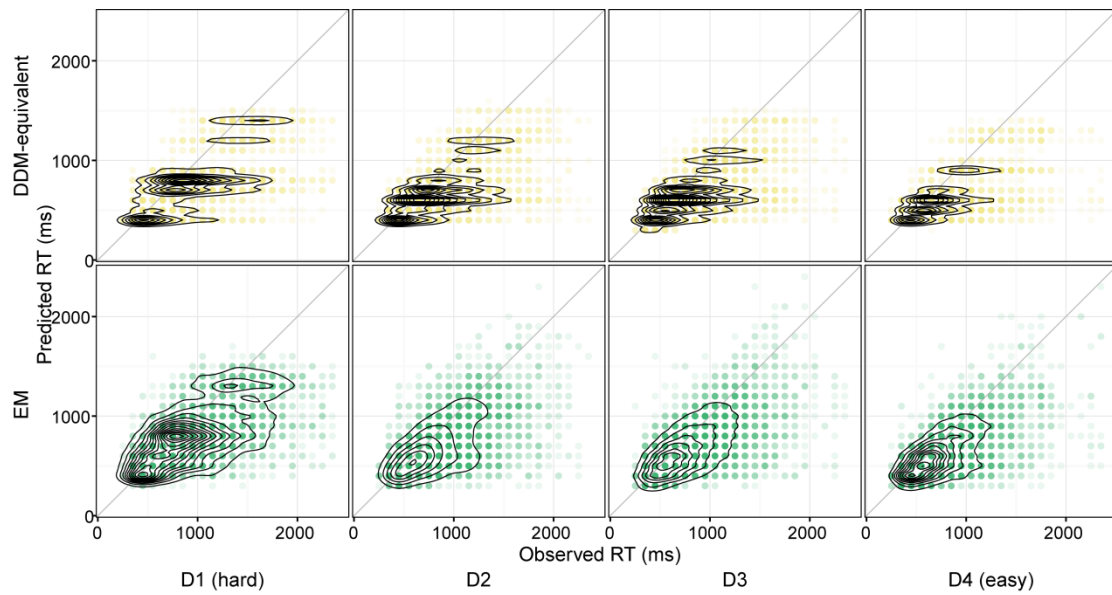

7

8 **Figure S1. Comparison of DDM-equivalent model and exact input model (ExaM) in terms of RT**  
 9 **point prediction accuracy.** Experimentally observed RTs are plotted against predicted RTs. Only  
 10 predictions that matched the observed choice were used for density calculation. Perfect predictions are  
 11 on the diagonal grey line. Contour lines indicate regions of highest density. Across difficulty levels, the  
 12 ExaM (green) predicts RTs better because the density outline of ExaM predictions more closely  
 13 resembles an ellipse along the diagonal line. In the DDM-equivalent model RT densities (yellow), in  
 14 turn, have less weight on the left side of the diagonal, i.e., they have a stronger bias towards providing  
 15 predictions with short RTs.

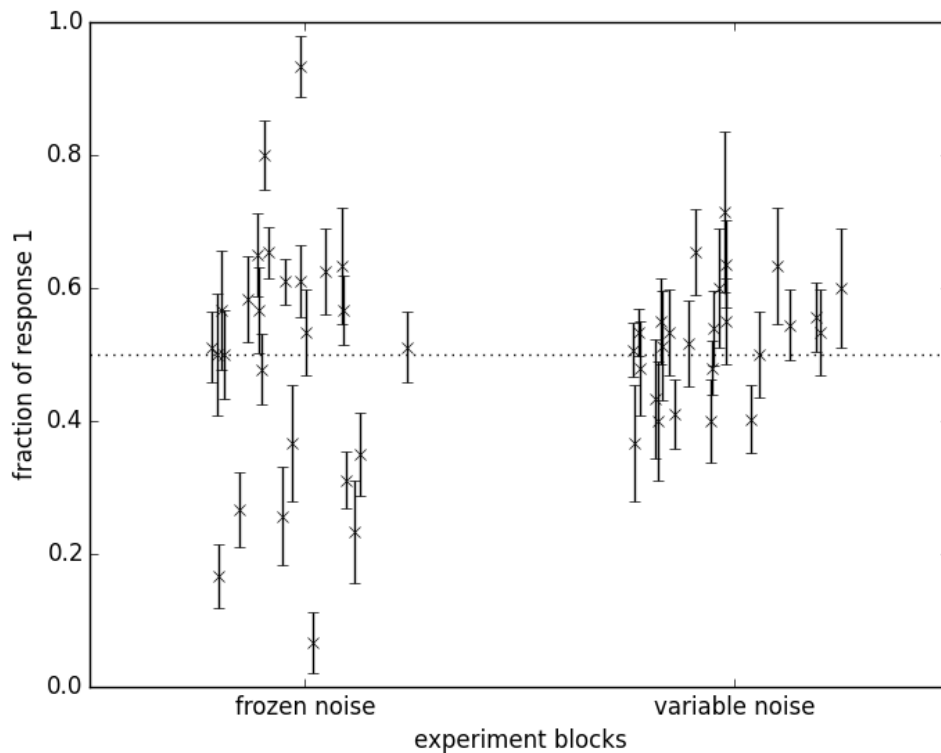

16

17 **Figure S2. Effect of stimulus noise on decisions in a random dot motion experiment.** We  
 18 reanalysed data of [Britten KH, Shadlen MN, Newsome WT, Movshon JA (1992) The analysis of  
 19 visual motion: a comparison of neuronal and psychophysical performance. J Neurosci 12:4745-4765]  
 20 available at <http://www.neuralsignal.org/data/09/nsa2009.1.html> together with further information  
 21 about the data. The data only contained 0% coherence trials of a single monkey. We show the fraction  
 22 of trials in which one of the two possible responses was made. Each point shows the fraction together  
 23 with its standard error for one block of trials. There were two different experimental conditions. In the  
 24 'frozen noise' condition (left) exactly the same random dot motion was shown on the screen in all trials  
 25 of the corresponding block. In the 'variable noise' condition (right) the random dot motion varied across  
 26 trials. We introduced random jitter along the abscissa within conditions to aid visibility. A fraction of  
 27 0.5 (dotted line) corresponds to the largest randomness in responses and fractions of 0 and 1 mean that  
 28 always the same response was given in all considered trials. With frozen noise, responses were clearly  
 29 more stereotyped than with variable noise, i.e., in 42% of the frozen noise blocks the shown fractions  
 30 exceeded a distance of 0.15 from 0.5, while this was true for only 8% of the variable noise blocks. This  
 31 indicates that in some blocks, the particular realisation of the random dot motion had a reproducible  
 32 effect on responses. Note that other trials with non-zero coherence occurred between the 0% coherence  
 33 trials in the experiment. Thus, it is unlikely that stereotyped responses resulted only from repeating the  
 34 response of the previous trial. Our analysis is available online at  
 35 <https://github.com/sbitzer/RDMfrozenNoise>.

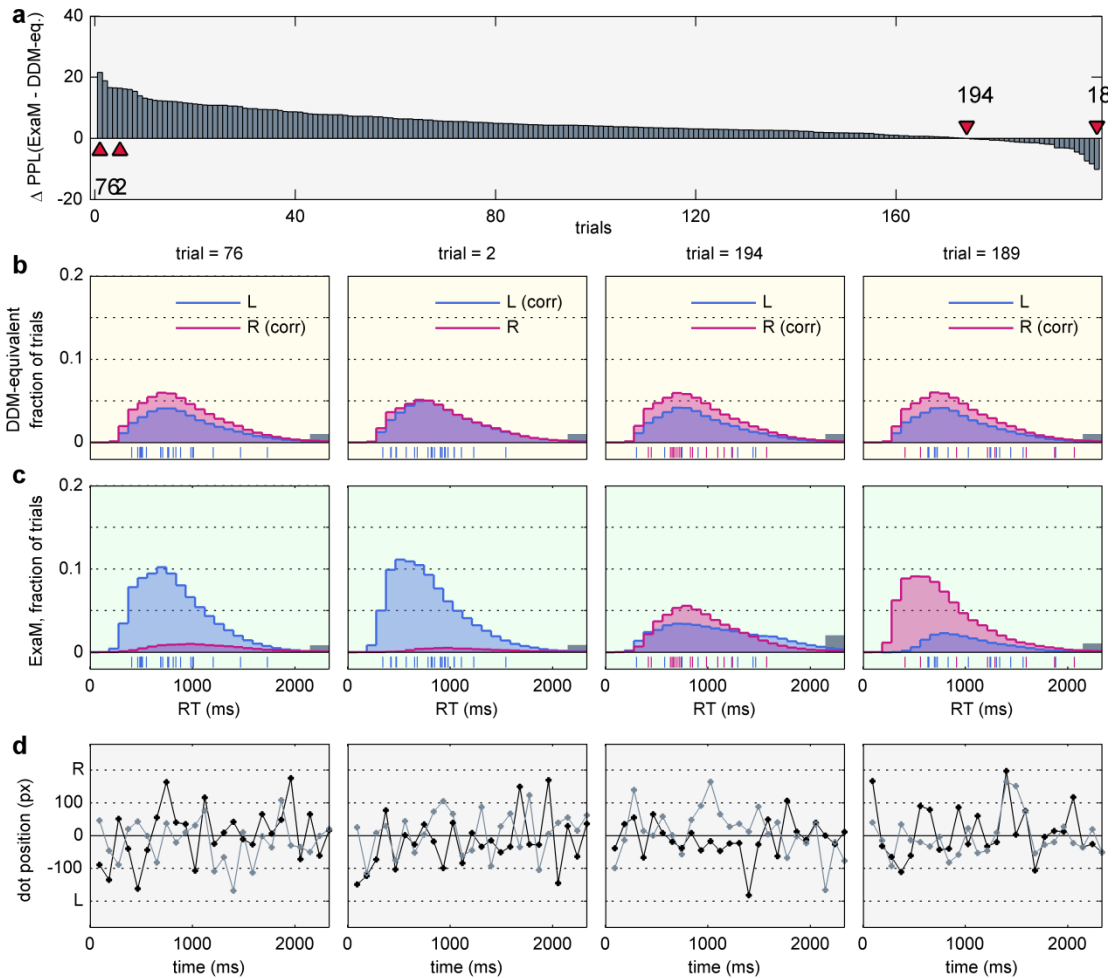

36

37 **Figure S3. Illustrative example result: Predicted RT distributions for all participants, most**  
 38 **difficult level (D1).** (a) Predictive posterior log-likelihood (PPL) difference between DDM-equivalent  
 39 (DDM-eq.) model and exact input model (ExaM) pooled over 24 participants. Red arrows indicate  
 40 representative trials that were selected for further description. (b) Predicted RT distribution for selected  
 41 trials from (a) under DDM-equivalent model. Blue and red bars indicate left and right responses  
 42 respectively, vertical bars under histogram indicate real responses and RTs of all 24 participants. The  
 43 correct target for each trial is indicated in the legend as 'corr'. (c) Same as (b) but under ExaM. (d)  
 44 Horizontal (black: x-axis, gray: y-axis) dot positions of the input for each trial. (b-d) For the first trial,  
 45 the ExaM gives a better explanation for most of the participants' behaviour since the actually observed  
 46 dot trajectory starts with strong evidence for the left target, giving an early RT distribution for the left,  
 47 followed by strong right evidence, which leads to RT predictions for the right. This reflects the  
 48 observed responses of participants. The second trial presents very strong evidence for the left (correct)  
 49 target so that most of the participants' responses were correct. This is captured well by the ExaM; the  
 50 participant responses (vertical lines under plots) are clustered around the peak of the predicted RT  
 51 distribution, and the DDM-equivalent model still predicts some right responses despite there being  
 52 little evidence for this choice in the early stage of the trial. The third trial shows a case where both  
 53 models have nearly the same PPL and give similar RT distributions. The fourth trial is an example of  
 54 when the DDM-equivalent model gives a better prediction than the ExaM. It seems that the ExaM

55 treats the second data point as extremely strong evidence for the right target which prompts an  
56 immediate right response. However, this is not what participants seem to do. Most of them waited for  
57 more evidence emerging before committing to a decision.

58

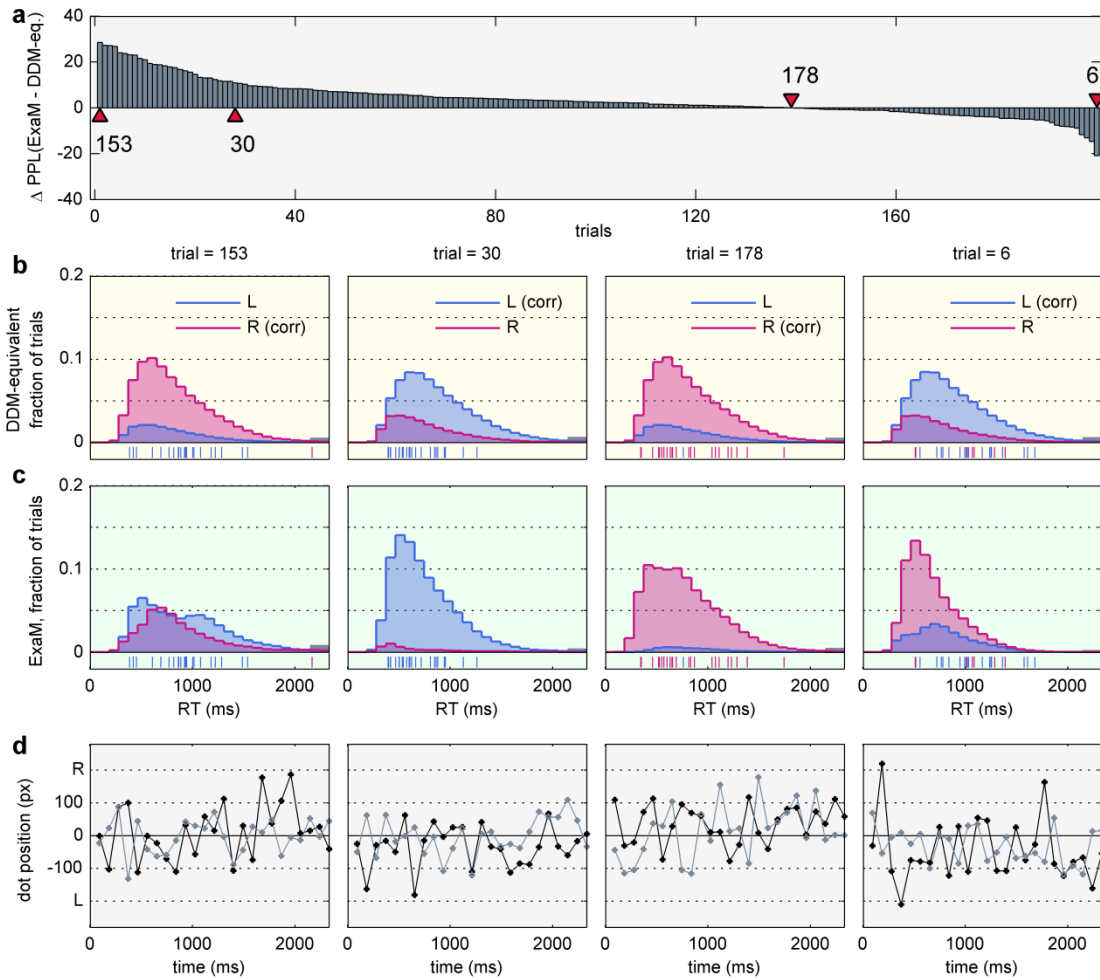

59

60 **Figure S4. Illustrative example result: Predicted RT distributions for all participants, second most**  
61 **difficult level (D2). Same format as in Figure S3.**

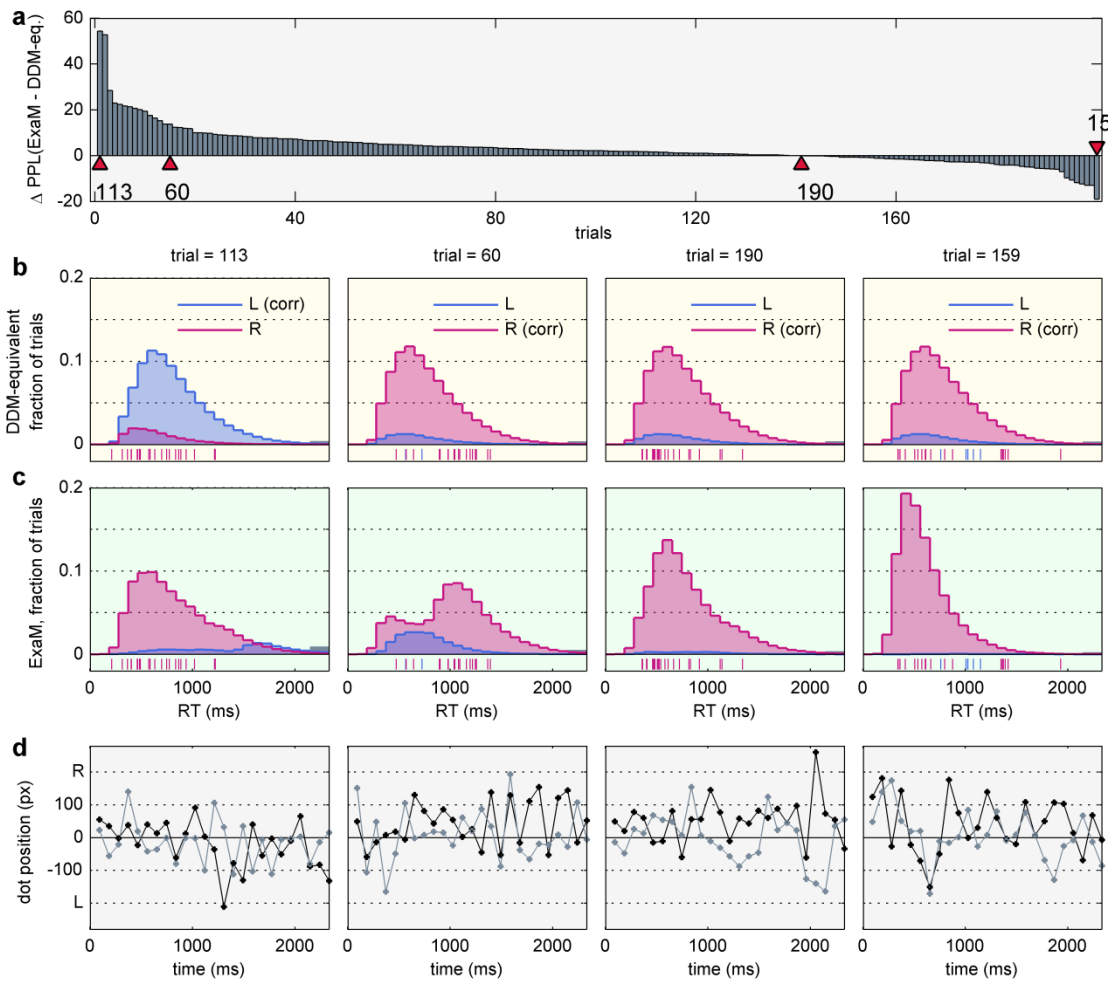

62

63 **Figure S5. Illustrative example result: Predicted RT distributions for all participants, second**  
 64 **easiest level (D3). Same format as in Figure S3.**

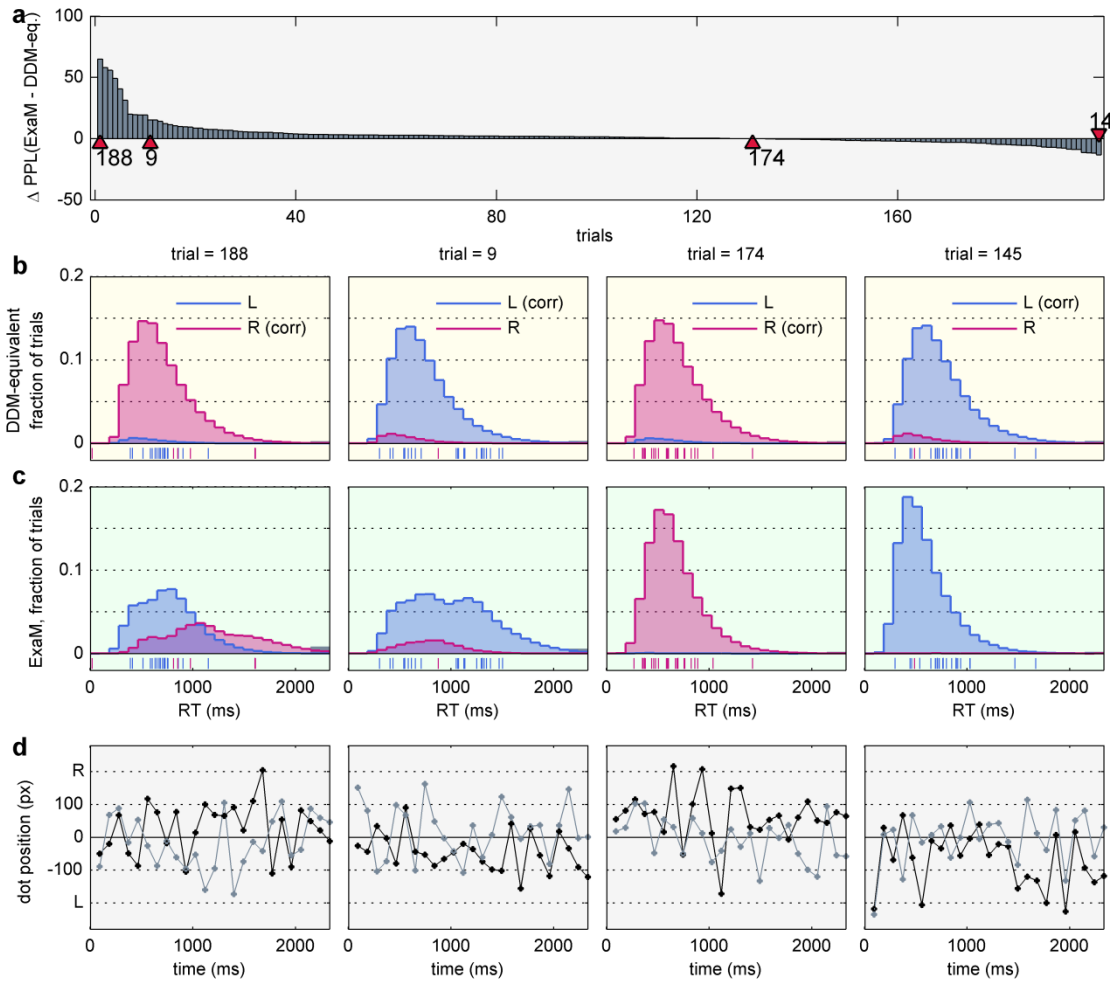

65

66 **Figure S6. Illustrative example result: Predicted RT distributions for all participants, easiest level**

67 **(D4)**. Same format as in Figure S3.
